# Supplementary material
Source: PubMed Central journal article supplement (PMC5336134)
Supplement: NIHMS840667-supplement-supp_info.pdf [file NIHMS840667-supplement-supp_info.pdf]

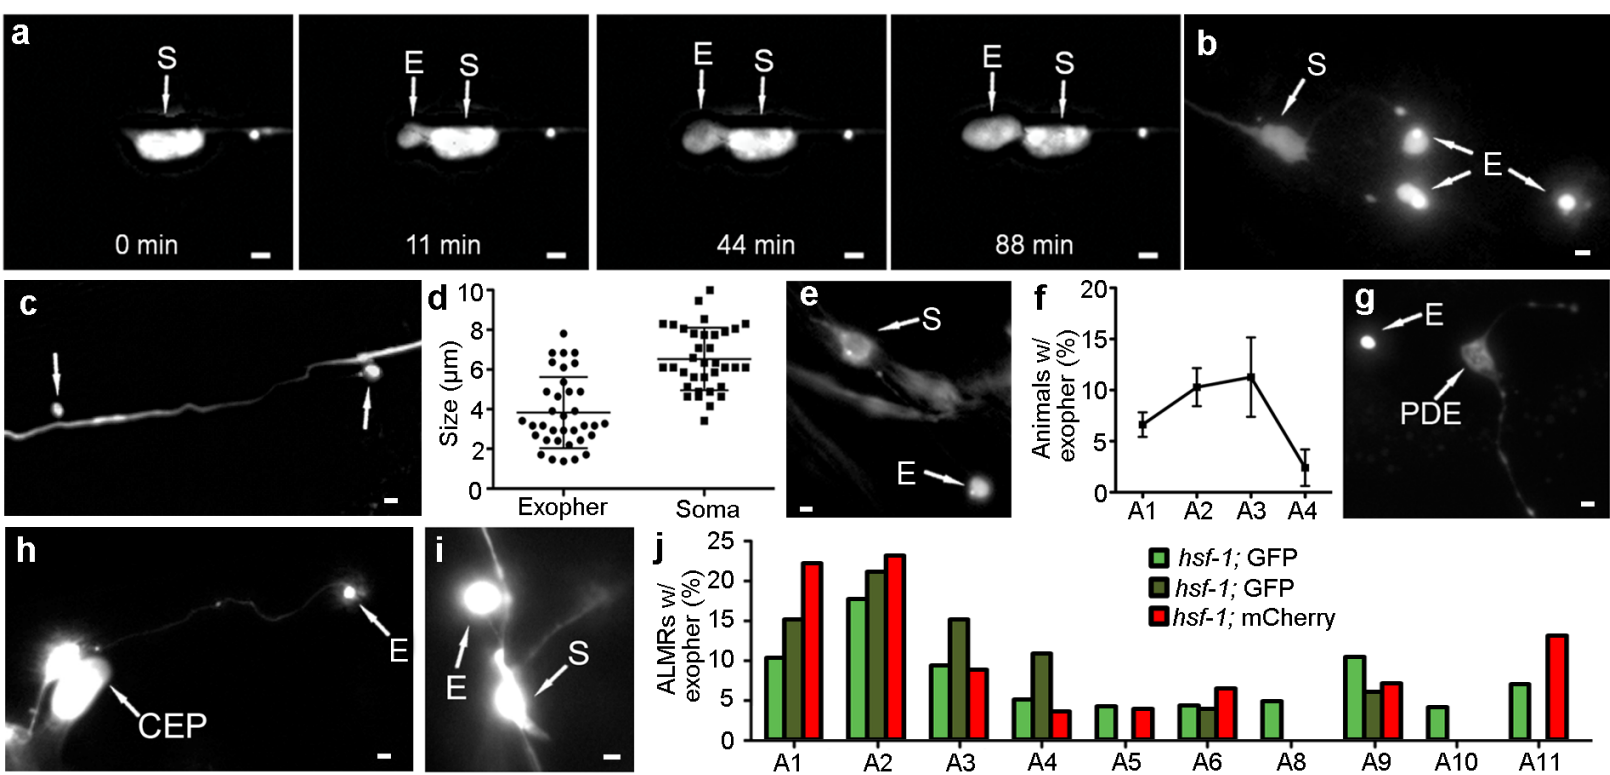

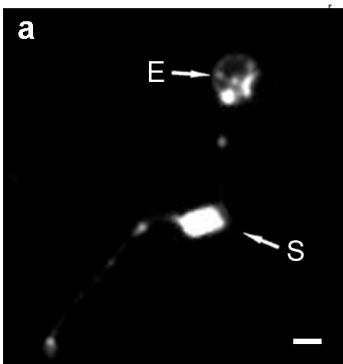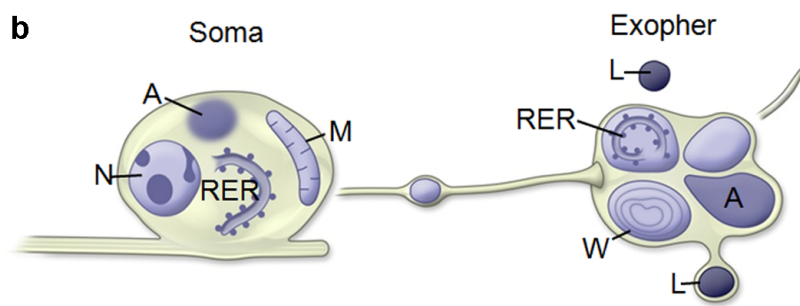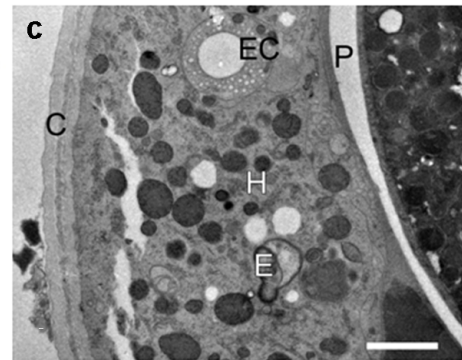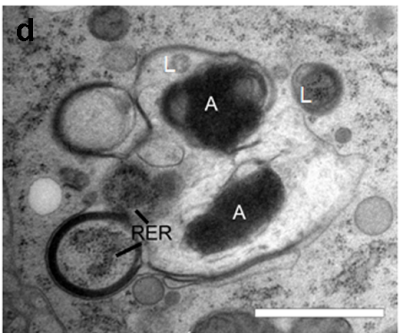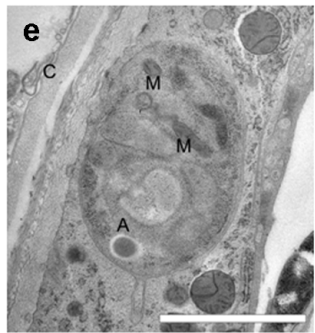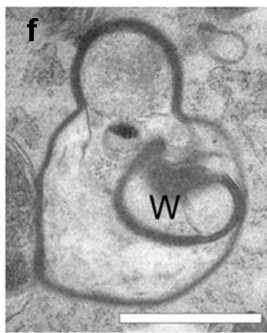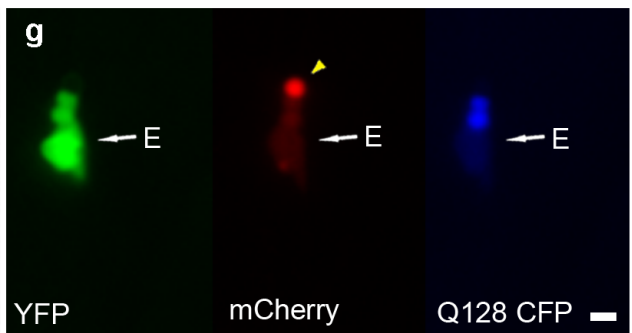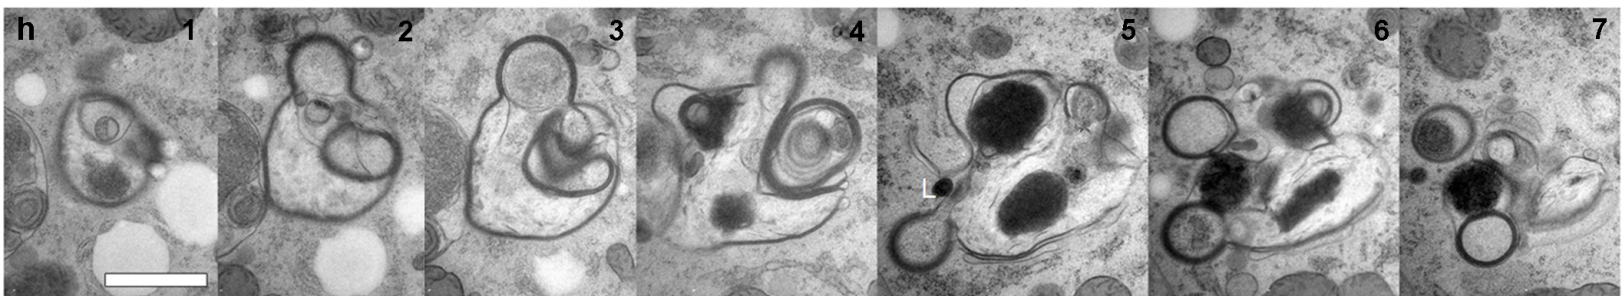

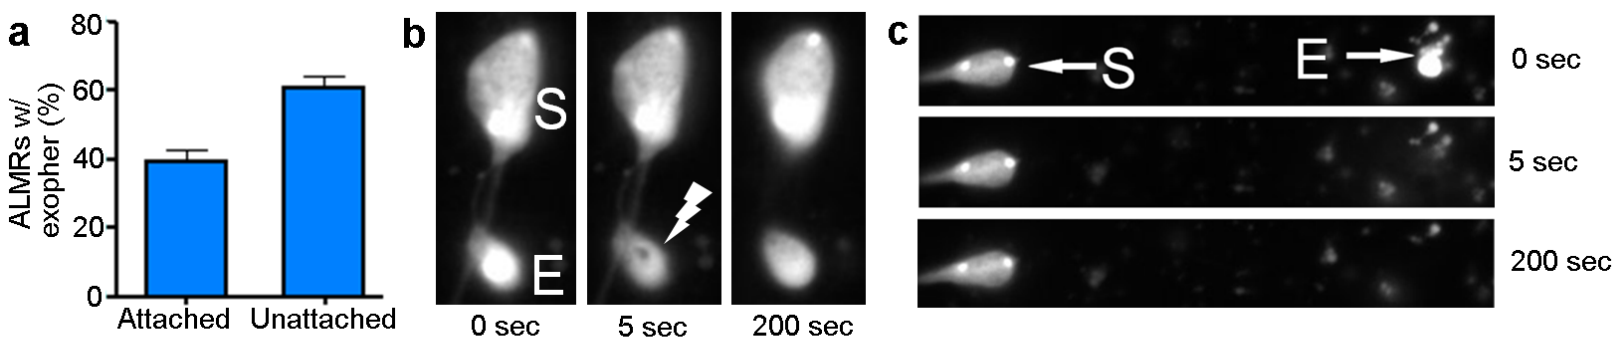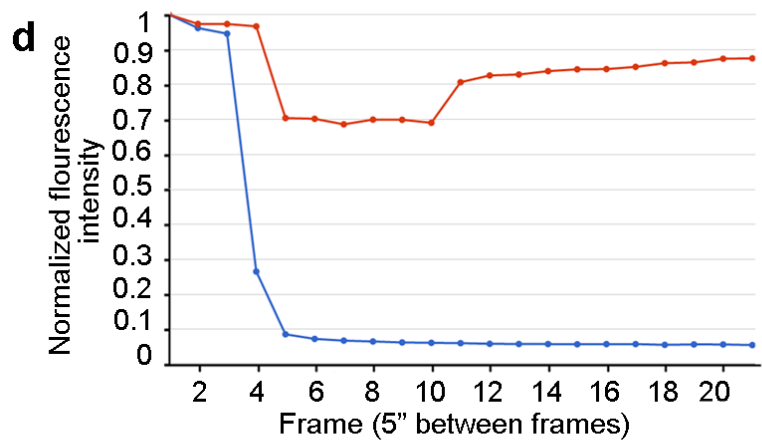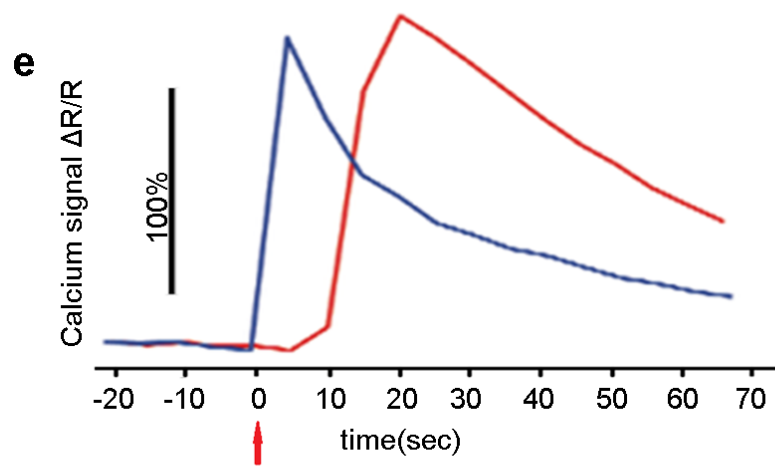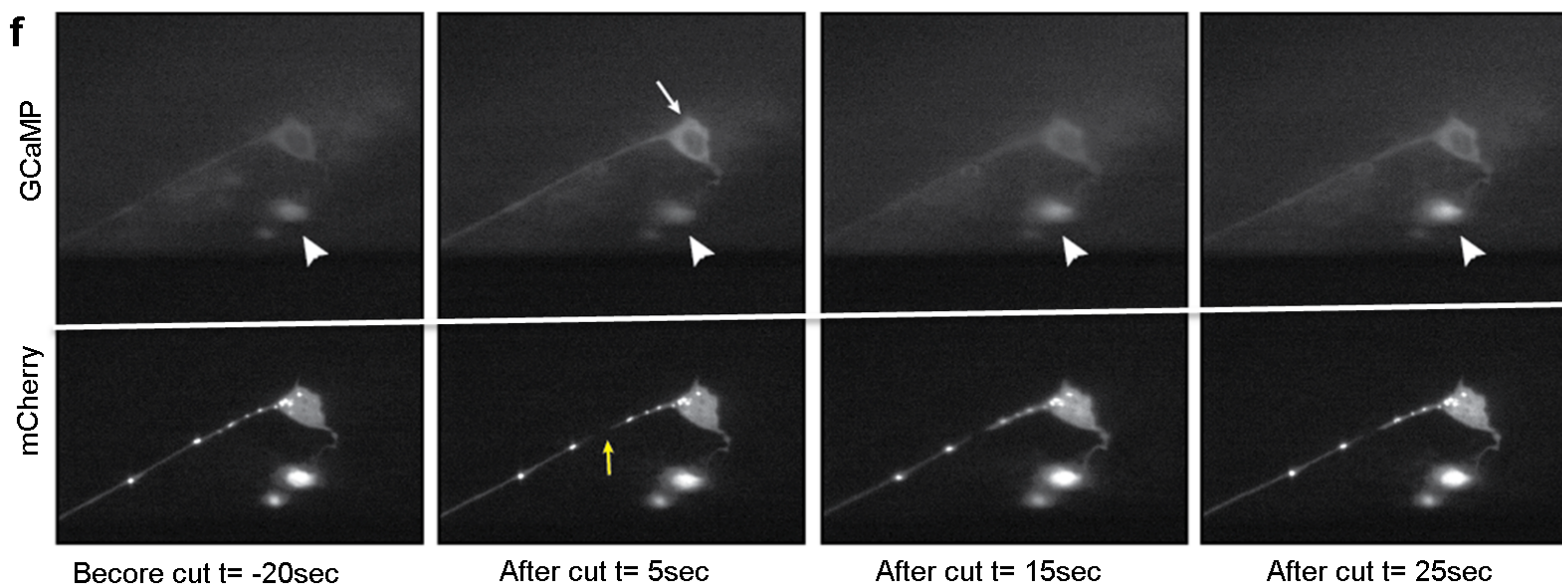

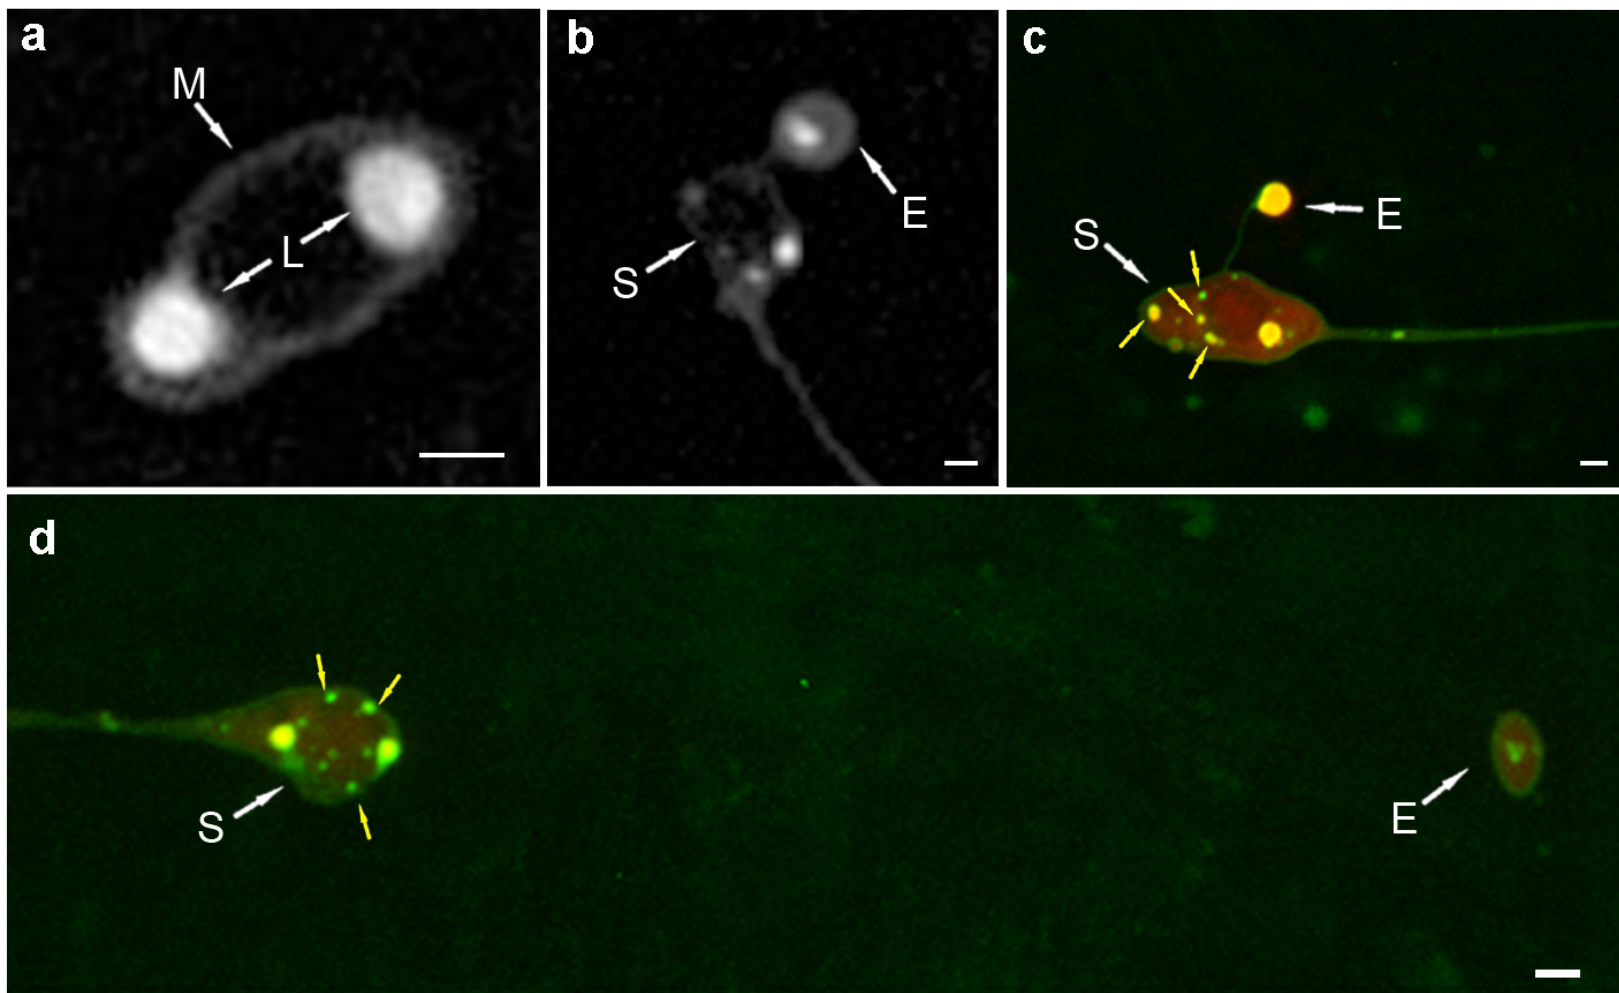

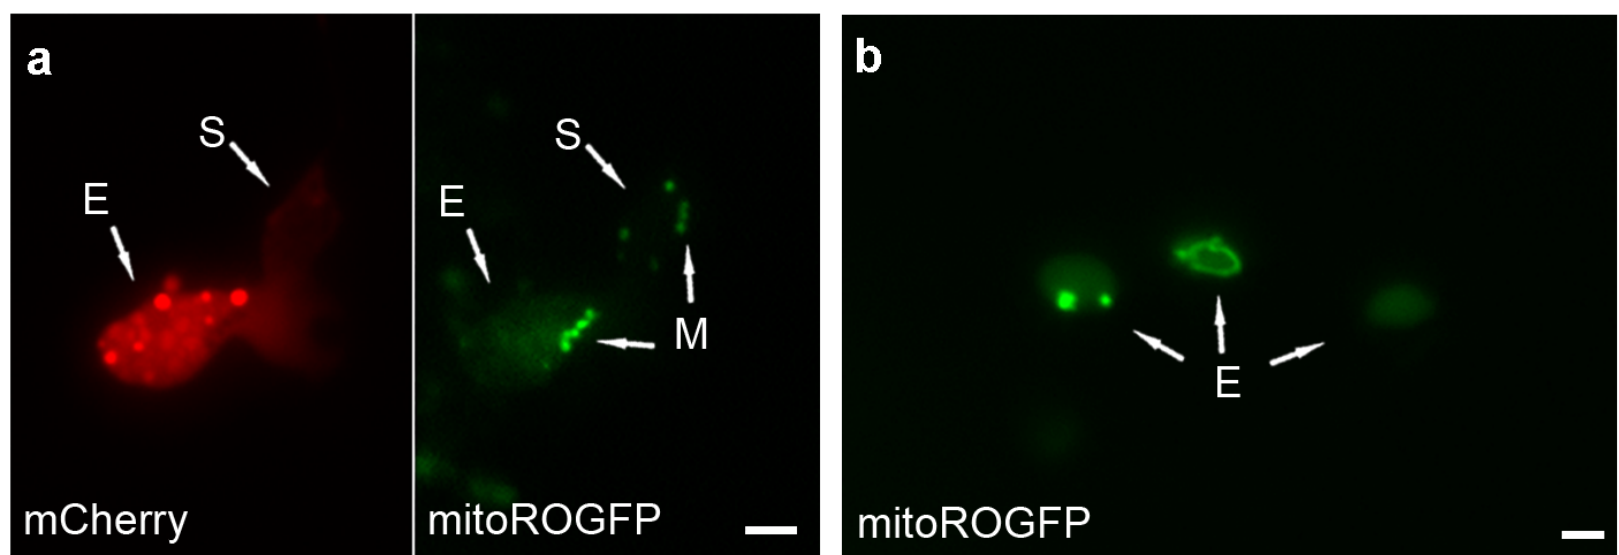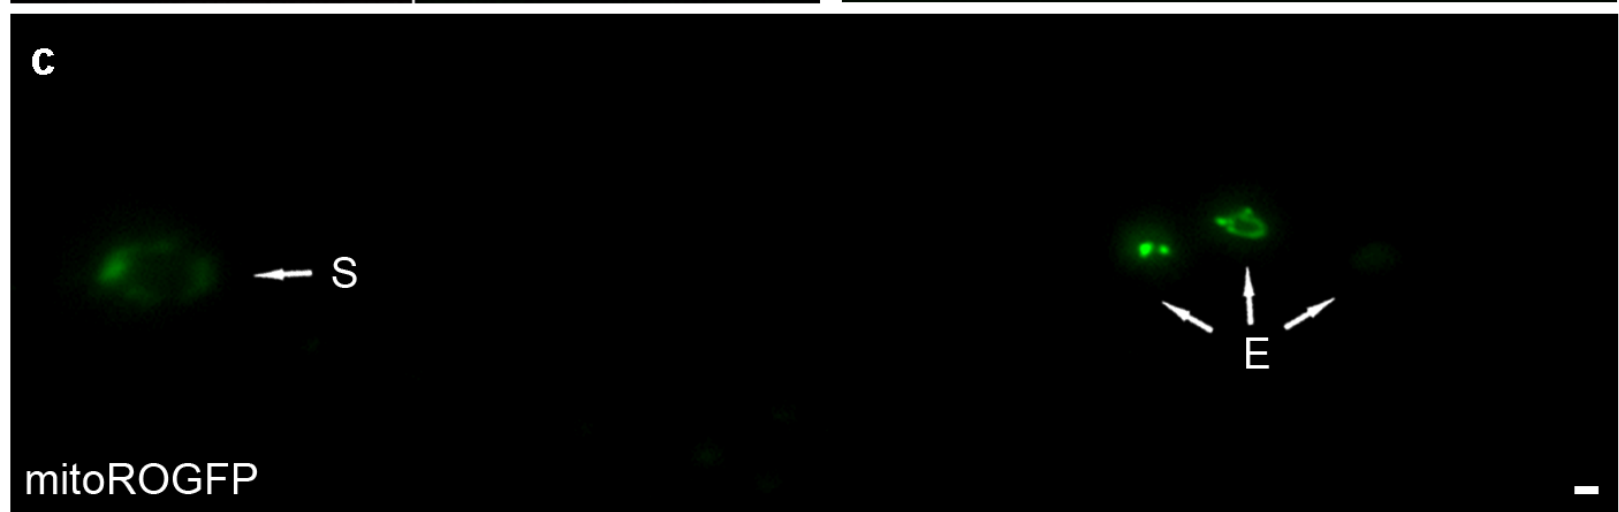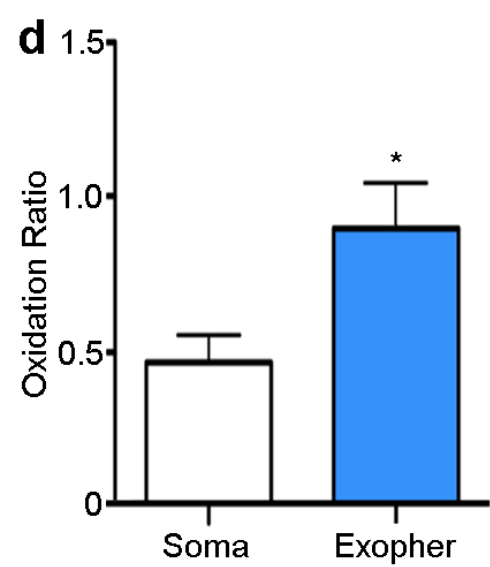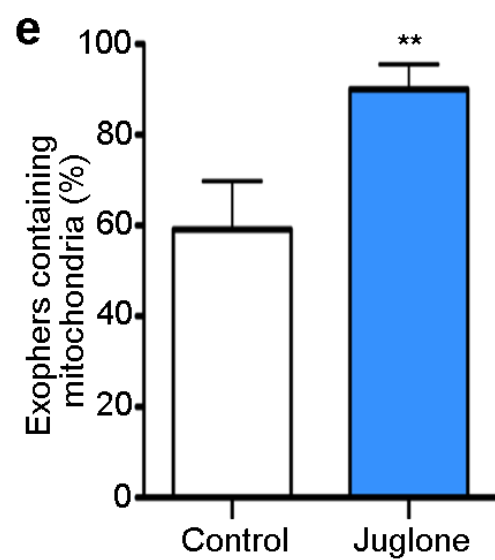

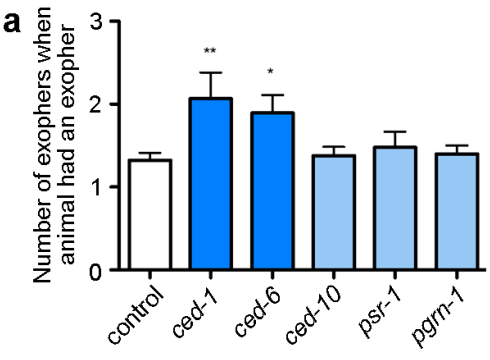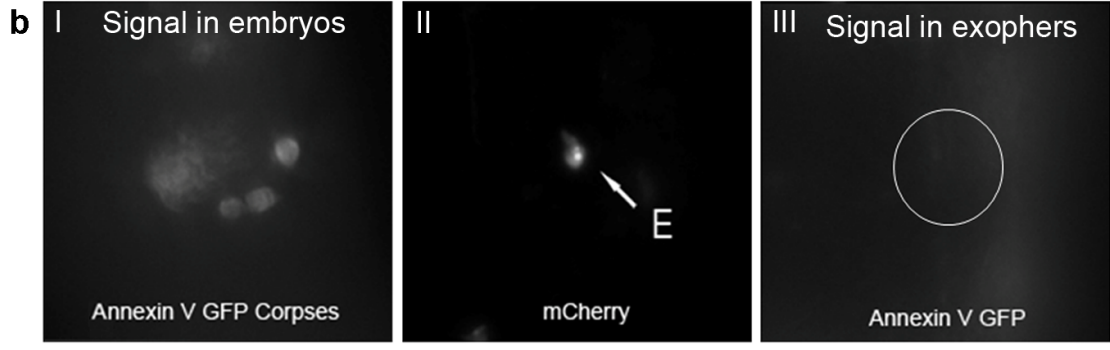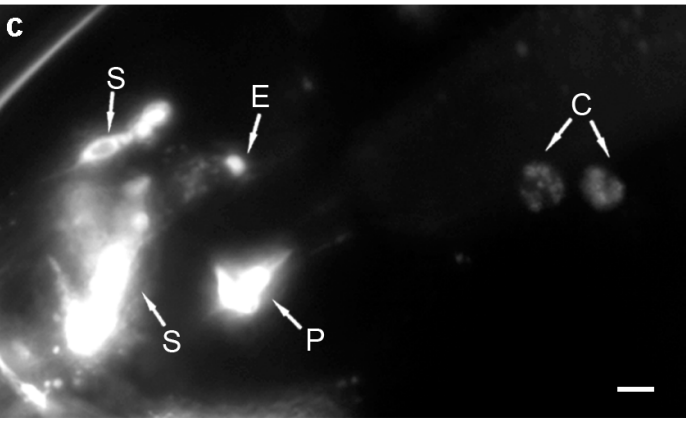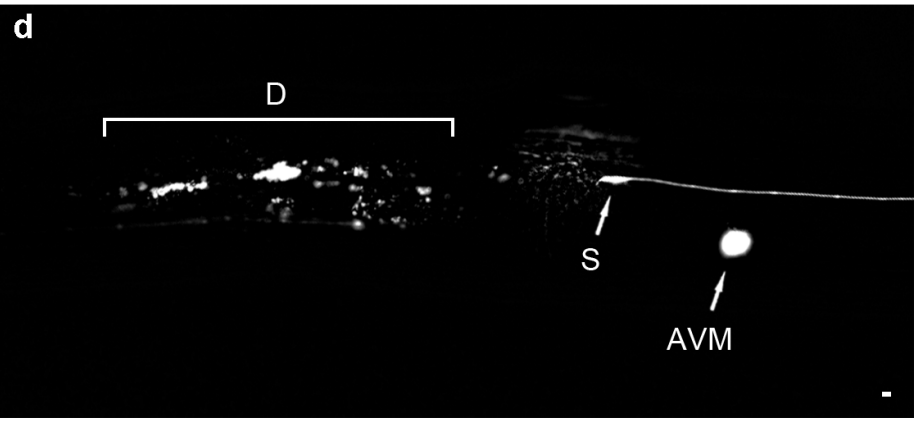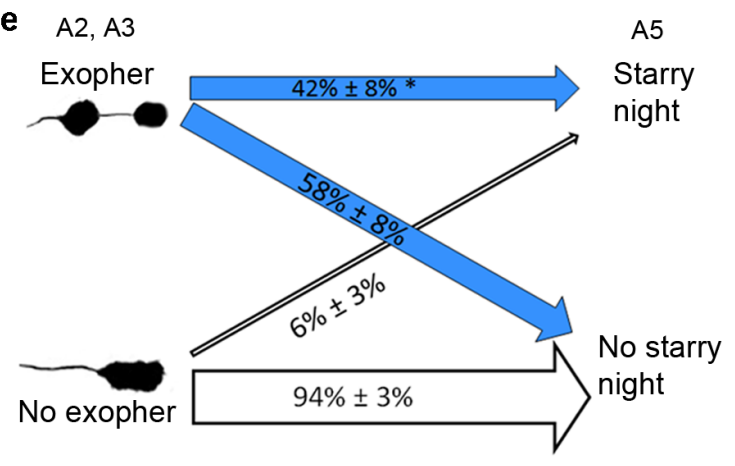

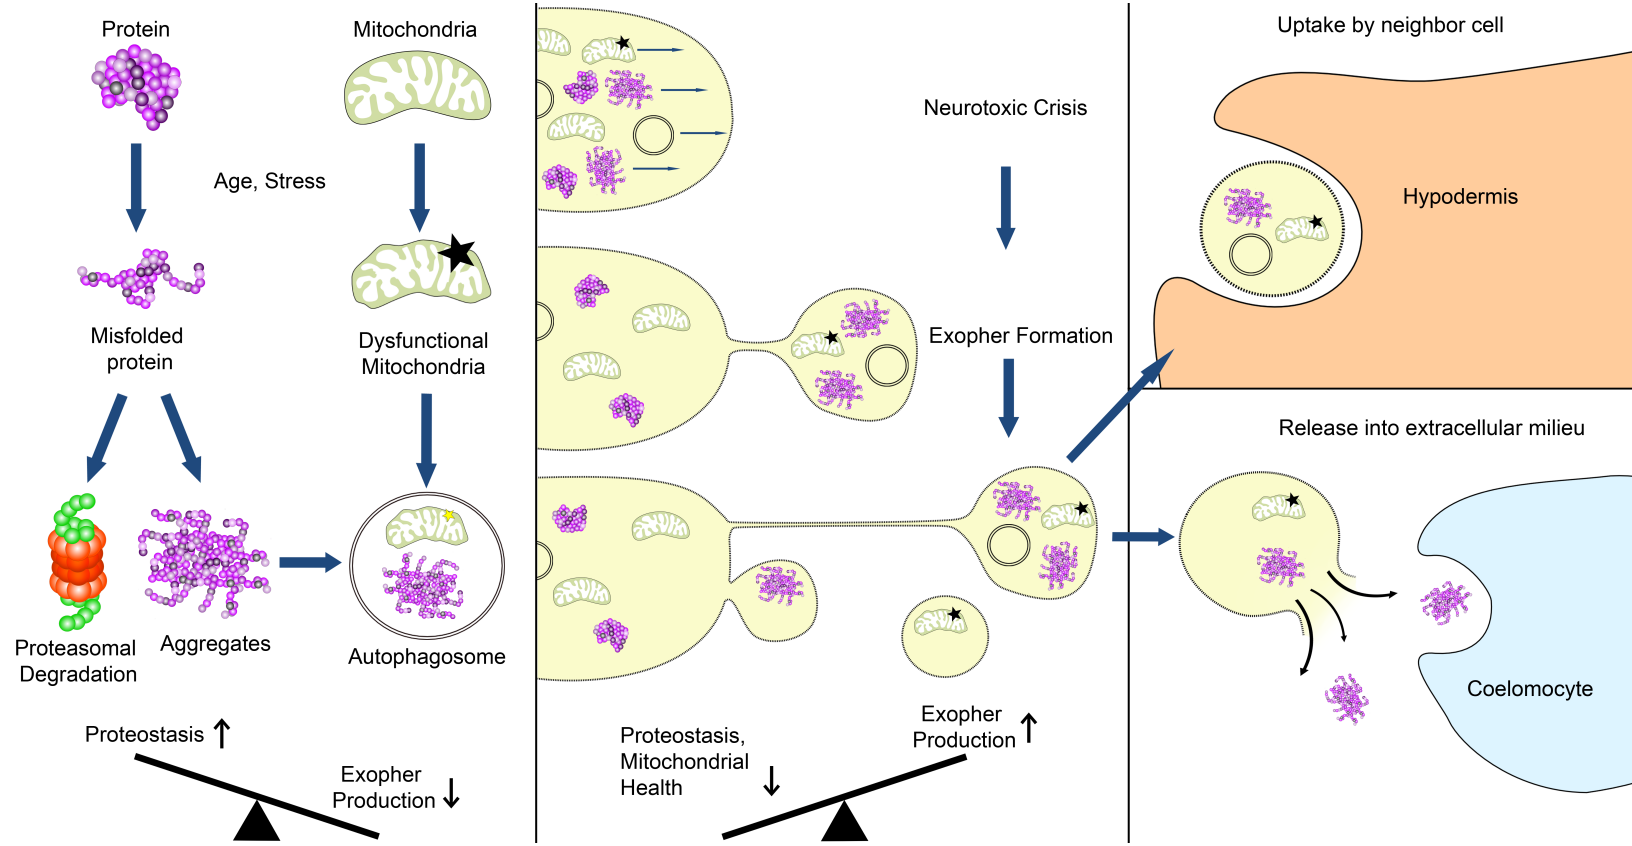

|                                         | <b>Exosomes</b>                                                | <b>Microvesicles</b>                       | <b>Migrasomes</b>                                 | <b>Exophers</b>                             |
|-----------------------------------------|----------------------------------------------------------------|--------------------------------------------|---------------------------------------------------|---------------------------------------------|
| <b>Diameter</b>                         | 30 nm--100 nm <sup>47</sup>                                    | 100 nm--1,000 nm <sup>47</sup>             | 500 nm--3,000 nm <sup>50</sup>                    | 1,000 nm--7,800 nm                          |
| <b>Timing of release</b>                | Tens of minutes <sup>48</sup>                                  | Seconds <sup>48</sup>                      | 40-200 minutes <sup>50</sup>                      | 15-60 minutes                               |
| <b>Mechanism of Release</b>             | Multi-vesicular bodies fuse to the cell membrane <sup>49</sup> | Outward budding and scission <sup>49</sup> | Expands at tip of retraction fibers <sup>50</sup> | Jettisoned from cell body                   |
| <b>ESCRT Machinery involved</b>         | Yes <sup>48</sup>                                              | ESCRT3; <i>tsg-101</i> <sup>48</sup>       | Unknown                                           | No                                          |
| <b>Attachment to releasing cell</b>     | No                                                             | No                                         | Yes (via retraction fibers) <sup>50</sup>         | Sometimes (via thin fiber)                  |
| <b>Actin required</b>                   | No                                                             | No                                         | Yes <sup>50</sup>                                 | Yes                                         |
| <b>Vesicular Contents</b>               | DNA, RNA, Proteins, Lipids <sup>49</sup>                       | DNA, RNA, Proteins, Lipids <sup>49</sup>   | Cytosol, Proteins <sup>50</sup>                   | Mitochondria, Lysosomes, Protein Aggregates |
| <b>Phosphatidyl-serine Distribution</b> | Membrane outer leaflet <sup>49</sup>                           | Membrane outer leaflet <sup>51</sup>       | Unknown                                           | Not displayed on membrane outer leaflet     |



**a. Exosome Biogenesis**

| Process Targeted | Gene Name      | P-value |
|------------------|----------------|---------|
| ESCRT-0          | <i>hgrs-1</i>  | 0.48    |
|                  | <i>stam-1</i>  | 0.21    |
| ESCRT-1          | <i>tsg-101</i> | 0.55    |
|                  | <i>vps-28</i>  | 0.67    |
|                  | <i>vps-37</i>  | 0.22    |
| ESCRT-2          | <i>vps-22</i>  | 0.50    |
|                  | <i>vps-25</i>  | 0.96    |
|                  | <i>vps-36</i>  | 0.54    |
| ESCRT-3          | <i>vps-20</i>  | 0.49    |
|                  | <i>vps-24</i>  | 0.89    |

**b. Cell Cycle-related**

| Gene Name     | P-value | Gene Name      | P-value |
|---------------|---------|----------------|---------|
| <i>cki-1</i>  | 0.03*   | <i>cit-1.2</i> | 0.75    |
| <i>ccnk-1</i> | 0.46    | <i>cki-2</i>   | 0.83    |
| <i>cdk-4</i>  | 0.84    | <i>cya-1</i>   | 0.52    |
| <i>cdk-9</i>  | 0.68    | <i>cya-2</i>   | 0.45    |
| <i>cdk-1</i>  | 0.40    | <i>cyb-2.1</i> | 0.52    |
| <i>cdk-12</i> | 0.23    | <i>cyd-1</i>   | 0.95    |
| <i>cdk-5</i>  | 0.72    | <i>cye-1</i>   | 0.95    |
| <i>cdk-8</i>  | 0.79    | <i>cyl-1</i>   | 0.32    |
| <i>cic-1</i>  | 0.95    | <i>dpl-1</i>   | 0.94    |

1 **Extended Data Video 1:**

2 An exopher is generated with a striking concentration of fluorescence segregated to the  
3 extrusion. Strain is  $Is[p_{mec-4}mCh2]$ . ALM neuron with mCherry-visualized cytoplasm and  
4 aggregates.

5

6 **Extended Data Video 2:**

7 An exopher is generated with evident filling and growth. S indicates the soma of an ALM  
8 neuron on adult day 2 with mCherry visualized; E indicates the significant extrusion of a  
9 balloon-like exopher, which grows with time. We noted that the size of this exopher  
10 increased for more than an hour, with fluorescence intensity increasing specifically in  
11 the exopher compartment, possibly via continual delivery of materials to the exopher  
12 after the initial formation. Strain is  $Is[p_{mec-4}mCh1]$ .

13

14 **Extended Data Video 3:**

15 The soma calcium wave induced by laser axotomy is followed by a calcium wave to  
16 connected exophers. We laser-cut an ALMR neuron that had a connected exopher in a  
17 day 2 adult that expressed both mCherry(bottom) and the calcium sensitive fluorophore,  
18 GCaMP3(top). Video shows the calcium wave that travels from soma to exopher.
